# Supplementary material for: Sweet Cherry Byproducts Processed by Green Extraction Techniques as a Source of Bioactive Compounds with Antiaging Properties
Source: MDPI journal article supplement (doi:10.3390/antiox9050418), 2020-05-13
Supplement: s1 [file s1]

**Table S1.** Percentage of photoprotection for 100 and 200  $\mu\text{g/mL}$  of scSFE extract and 800–1200  $\text{J/m}^2$  of UVB, normalized to its respective irradiated condition. These values were calculated as indicated previously.

| scSFE extract                      | Photoprotection (%) |                     |
|------------------------------------|---------------------|---------------------|
|                                    | UVB Dose            |                     |
| Concentration ( $\mu\text{g/mL}$ ) | 800 $\text{J/m}^2$  | 1200 $\text{J/m}^2$ |
| 100                                | 14.61               | 3.51                |
| 200                                | 36.53               | 13.99               |

Table S2. Percentage of oxidative stress inhibition of 100 and 200  $\mu\text{g/mL}$  scSFE extract against oxidative stress induced by UVA and UVB. Doses of 3 and 6  $\text{J/cm}^2$  UVA and 800 and 1200  $\text{J/m}^2$  UVB were used. These values were calculated as indicated previously.

| scSFE Extract ( $\mu\text{g/mL}$ ) | Oxidative Stress Inhibition (%) |                   |                    |                     |
|------------------------------------|---------------------------------|-------------------|--------------------|---------------------|
|                                    | UVA Dose                        |                   | UVB Dose           |                     |
|                                    | 3 $\text{J/cm}^2$               | 6 $\text{J/cm}^2$ | 800 $\text{J/m}^2$ | 1200 $\text{J/m}^2$ |
| 100                                | 43.38                           | 44.12             | 18.87              | 36.51               |
| 200                                | 82.42                           | 78.69             | 48.34              | 66.33               |
